CORRECTION

# Correction: Twenty-five-year trends in breastfeeding initiation: The effects of sociodemographic changes in Great Britain, 1985-2010

The *PLOS ONE* Staff

Figs 1 and 2 are incorrect. The authors have provided corrected versions here. The publisher apologizes for the error.

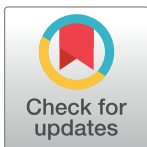

---

 OPEN ACCESS

**Citation:** The *PLOS ONE* Staff (2019) Correction: Twenty-five-year trends in breastfeeding initiation: The effects of sociodemographic changes in Great Britain, 1985-2010. *PLoS ONE* 14(2): e0212301. <https://doi.org/10.1371/journal.pone.0212301>

**Published:** February 7, 2019

**Copyright:** © 2019 The PLOS ONE Staff. This is an open access article distributed under the terms of the [Creative Commons Attribution License](https://creativecommons.org/licenses/by/4.0/), which permits unrestricted use, distribution, and reproduction in any medium, provided the original author and source are credited.

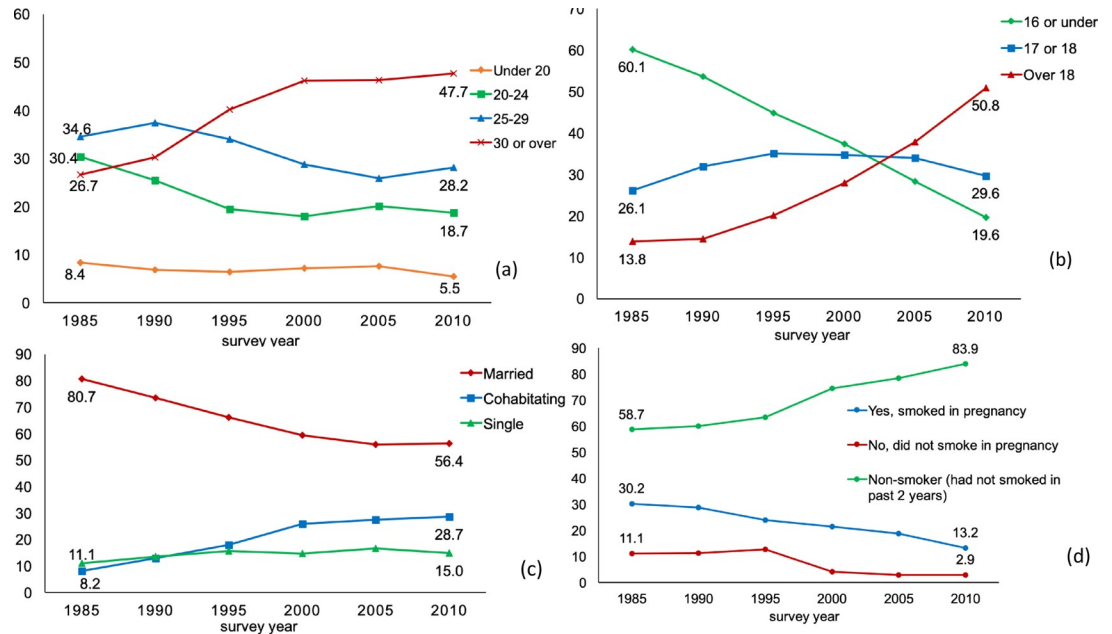

**Fig 1. Changing distributions of the sociodemographic characteristics of mothers in GB, 1985 to 2010.** A) Proportion of mothers by age at delivery (maternal age); B) Proportion of mothers by education; C) Proportion of mothers by partnership status; D) Proportion of mothers by smoking status in pregnancy.

<https://doi.org/10.1371/journal.pone.0212301.g001>

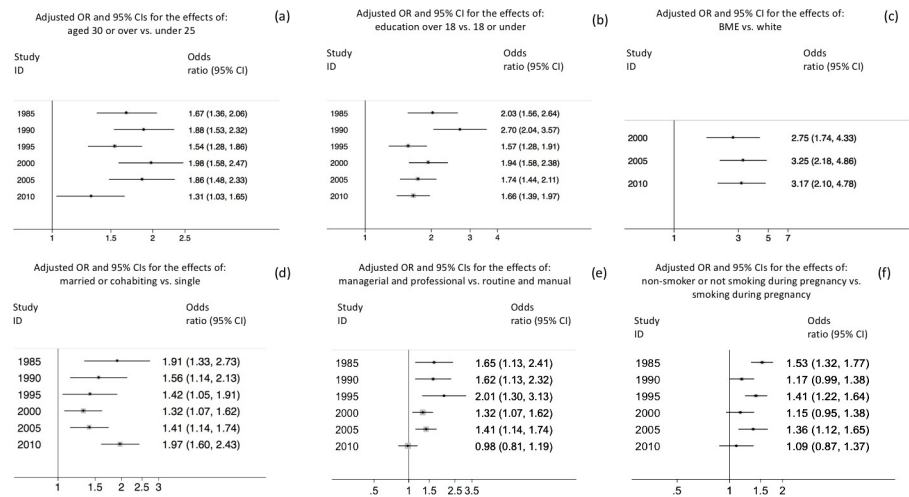

**Fig 2. Changes in the associations between breastfeeding initiation and sociodemographic subgroups of mothers in GB, 1985 to 2010.** A) Maternal age; B) Education; C) Ethnicity; D) Partnership status; E) SES; F) Smoking in pregnancy.

<https://doi.org/10.1371/journal.pone.0212301.g002>

## Reference

1. Simpson DA, Quigley MA, Kurinczuk JJ, Carson C (2019) Twenty-five-year trends in breastfeeding initiation: The effects of sociodemographic changes in Great Britain, 1985–2010. *PLoS ONE* 14(1): e0210838. <https://doi.org/10.1371/journal.pone.0210838> PMID: 30653579
